# Supplementary material for: Enrichment and Evaluation of Antitumor Properties of Total Flavonoids from Juglans mandshurica Maxim
Source: MDPI journal article supplement (doi:10.3390/molecules29091976), 2024-04-25
Supplement: s1 [file s1]

## Supplementary materials

**Table S1.** Flavonoids in JMFs were identified by HPLC-MS/MS

| No.                                       | Compound name            | Predicted formula                               | Retention time (min) | Relative molecular weight | Peak area |
|-------------------------------------------|--------------------------|-------------------------------------------------|----------------------|---------------------------|-----------|
| <b>chalcones and dihydrochalcones (6)</b> |                          |                                                 |                      |                           |           |
| 1                                         | naringenin chalcone      | C <sub>15</sub> H <sub>12</sub> O <sub>5</sub>  | 8.52                 | 272.253                   | 216500000 |
| 2                                         | butein                   | C <sub>15</sub> H <sub>12</sub> O <sub>5</sub>  | 0.95                 | 272.069                   | 9251      |
| 3                                         | trilobatin               | C <sub>21</sub> H <sub>24</sub> O <sub>10</sub> | 7.52                 | 436.409                   | 5249000   |
| 4                                         | isoliquiritigenin        | C <sub>15</sub> H <sub>12</sub> O <sub>4</sub>  | 9.23                 | 256.25                    | 4001      |
| 5                                         | cardamonin               | C <sub>16</sub> H <sub>14</sub> O <sub>4</sub>  | 11.62                | 270.28                    | 15330     |
| 6                                         | phloretin                | C <sub>15</sub> H <sub>14</sub> O <sub>5</sub>  | 8.60                 | 274.27                    | 412200    |
| <b>flavanones (21)</b>                    |                          |                                                 |                      |                           |           |
| 7                                         | eriodictyol              | C <sub>15</sub> H <sub>12</sub> O <sub>6</sub>  | 8.00                 | 288.252                   | 13910000  |
| 8                                         | taxifolin O-glucoside    | C <sub>21</sub> H <sub>22</sub> O <sub>12</sub> | 5.31                 | 466.392                   | 10670000  |
| 9                                         | neohesperidin            | C <sub>28</sub> H <sub>34</sub> O <sub>15</sub> | 7.20                 | 610.56                    | 241900    |
| 10                                        | naringin                 | C <sub>27</sub> H <sub>32</sub> O <sub>14</sub> | 6.98                 | 580.53                    | 808600    |
| 11                                        | narirutin                | C <sub>27</sub> H <sub>32</sub> O <sub>14</sub> | 6.84                 | 580.535                   | 1084000   |
| 12                                        | butin                    | C <sub>15</sub> H <sub>12</sub> O <sub>5</sub>  | 8.61                 | 272.069                   | 172000000 |
| 13                                        | hesperidin               | C <sub>28</sub> H <sub>34</sub> O <sub>15</sub> | 7.09                 | 610.56                    | 195300    |
| 14                                        | hesperetin               | C <sub>16</sub> H <sub>14</sub> O <sub>6</sub>  | 8.97                 | 302.27                    | 103600    |
| 15                                        | liquiritigenin           | C <sub>15</sub> H <sub>12</sub> O <sub>4</sub>  | 8.90                 | 256.25                    | 2964      |
| 16                                        | purpurin                 | C <sub>14</sub> H <sub>8</sub> O <sub>5</sub>   | 10.55                | 256.21                    | 874800    |
| 17                                        | liquiritin               | C <sub>21</sub> H <sub>22</sub> O <sub>9</sub>  | 6.98                 | 418.39                    | 12690     |
| 18                                        | naringenin               | C <sub>15</sub> H <sub>12</sub> O <sub>5</sub>  | 8.68                 | 272.25                    | 153200000 |
| 19                                        | pinocembrin              | C <sub>15</sub> H <sub>12</sub> O <sub>4</sub>  | 10.37                | 256.25                    | 14150     |
| 20                                        | neoeriocitrin            | C <sub>27</sub> H <sub>32</sub> O <sub>15</sub> | 6.38                 | 596.542                   | 2371000   |
| 21                                        | poncirin                 | C <sub>28</sub> H <sub>34</sub> O <sub>14</sub> | 8.05                 | 594.561                   | 487100    |
| 22                                        | bavachin                 | C <sub>20</sub> H <sub>20</sub> O <sub>4</sub>  | 10.72                | 324.37                    | 4322      |
| 23                                        | phellodensin F           | C <sub>26</sub> H <sub>30</sub> O <sub>10</sub> | 7.01                 | 502.2                     | 411100    |
| 24                                        | hesperetin 5-O-glucoside | C <sub>22</sub> H <sub>24</sub> O <sub>11</sub> | 6.59                 | 464.419                   | 63900000  |
| 25                                        | prunin                   | C <sub>21</sub> H <sub>22</sub> O <sub>10</sub> | 7.02                 | 434.121                   | 39270000  |
| 26                                        | naringerin               | C <sub>15</sub> H <sub>12</sub> O <sub>5</sub>  | 8.64                 | 272.253                   | 209200000 |
| 27                                        | fustin                   | C <sub>15</sub> H <sub>12</sub> O <sub>6</sub>  | 5.89                 | 288.252                   | 62390000  |
| <b>flavones and flavonols (43)</b>        |                          |                                                 |                      |                           |           |
| 28                                        | isoschaftoside           | C <sub>26</sub> H <sub>28</sub> O <sub>14</sub> | 6.03                 | 564.499                   | 11700     |
| 29                                        | myricitrin               | C <sub>21</sub> H <sub>20</sub> O <sub>12</sub> | 6.55                 | 464.38                    | 6488000   |
| 30                                        | azaleatin                | C <sub>16</sub> H <sub>12</sub> O <sub>7</sub>  | 7.30                 | 316.265                   | 1584000   |

| No. | Compound name             | Predicted formula                               | Retention time (min) | Relative molecular weight | Peak area |
|-----|---------------------------|-------------------------------------------------|----------------------|---------------------------|-----------|
| 31  | apigenin                  | C <sub>15</sub> H <sub>10</sub> O <sub>5</sub>  | 8.70                 | 270.24                    | 587300    |
| 32  | kaempferol                | C <sub>15</sub> H <sub>10</sub> O <sub>6</sub>  | 8.81                 | 286.24                    | 1406000   |
| 33  | luteolin                  | C <sub>15</sub> H <sub>10</sub> O <sub>6</sub>  | 8.06                 | 286.24                    | 240200    |
| 34  | baicalein                 | C <sub>15</sub> H <sub>10</sub> O <sub>5</sub>  | 9.18                 | 270.24                    | 8831      |
| 35  | myricetin                 | C <sub>15</sub> H <sub>10</sub> O <sub>8</sub>  | 7.34                 | 318.24                    | 13230000  |
| 36  | quercitrin                | C <sub>21</sub> H <sub>20</sub> O <sub>11</sub> | 7.24                 | 448.38                    | 5939000   |
| 37  | quercetin                 | C <sub>15</sub> H <sub>10</sub> O <sub>7</sub>  | 8.96                 | 302.236                   | 870600    |
| 38  | quercetin-3'-O-glucoside  | C <sub>21</sub> H <sub>20</sub> O <sub>12</sub> | 6.53                 | 464.382                   | 1684000   |
| 39  | 3'-hydroxyflavone         | C <sub>15</sub> H <sub>10</sub> O <sub>3</sub>  | 10.05                | 238.24                    | 44830     |
| 40  | hyperoside                | C <sub>21</sub> H <sub>20</sub> O <sub>12</sub> | 6.55                 | 464.38                    | 4995000   |
| 41  | isovitexin                | C <sub>21</sub> H <sub>20</sub> O <sub>10</sub> | 6.53                 | 432.378                   | 10310     |
| 42  | tiliroside                | C <sub>30</sub> H <sub>26</sub> O <sub>13</sub> | 7.88                 | 594.52                    | 20790     |
| 43  | isorhamnetin              | C <sub>16</sub> H <sub>12</sub> O <sub>7</sub>  | 8.97                 | 316.262                   | 37280     |
| 44  | rutin                     | C <sub>27</sub> H <sub>30</sub> O <sub>16</sub> | 6.45                 | 610.518                   | 40510     |
| 45  | vitexin                   | C <sub>21</sub> H <sub>20</sub> O <sub>10</sub> | 6.56                 | 432.38                    | 7166      |
| 46  | wogonin                   | C <sub>16</sub> H <sub>12</sub> O <sub>5</sub>  | 10.29                | 284.26                    | 4223      |
| 47  | diosmetin                 | C <sub>16</sub> H <sub>12</sub> O <sub>6</sub>  | 8.91                 | 300.26                    | 180500    |
| 48  | scutellarein              | C <sub>15</sub> H <sub>10</sub> O <sub>6</sub>  | 7.64                 | 286.236                   | 11030     |
| 49  | astragalin                | C <sub>21</sub> H <sub>20</sub> O <sub>11</sub> | 7.24                 | 448.38                    | 5270000   |
| 50  | syringetin                | C <sub>17</sub> H <sub>14</sub> O <sub>8</sub>  | 7.87                 | 346.069                   | 70860     |
| 51  | kaempferol 7-O-rhamnoside | C <sub>21</sub> H <sub>20</sub> O <sub>10</sub> | 7.36                 | 432.106                   | 1499000   |
| 52  | laricitrin                | C <sub>16</sub> H <sub>12</sub> O <sub>8</sub>  | 2.60                 | 332.262                   | 2480000   |
| 53  | isoquercitrin             | C <sub>21</sub> H <sub>20</sub> O <sub>12</sub> | 6.60                 | 464.38                    | 1143000   |
| 54  | vaccarin                  | C <sub>32</sub> H <sub>38</sub> O <sub>19</sub> | 5.90                 | 726.633                   | 6674      |
| 55  | epimedin A                | C <sub>39</sub> H <sub>50</sub> O <sub>20</sub> | 7.80                 | 838.802                   | 9121      |
| 56  | mosloflavone              | C <sub>17</sub> H <sub>14</sub> O <sub>5</sub>  | 11.74                | 298.295                   | 275700    |
| 57  | camelliaside A            | C <sub>33</sub> H <sub>40</sub> O <sub>20</sub> | 6.31                 | 756.668                   | 33020     |
| 58  | myricetin 3-O-galactoside | C <sub>21</sub> H <sub>20</sub> O <sub>13</sub> | 7.19                 | 480.376                   | 596500    |
| 59  | neodiosmin                | C <sub>28</sub> H <sub>32</sub> O <sub>15</sub> | 7.12                 | 608.545                   | 411800    |
| 60  | toringin                  | C <sub>21</sub> H <sub>20</sub> O <sub>9</sub>  | 6.23                 | 416.378                   | 300200    |
| 61  | moslosooflavone           | C <sub>17</sub> H <sub>14</sub> O <sub>5</sub>  | 11.74                | 298.295                   | 204200    |
| 62  | ladanein                  | C <sub>17</sub> H <sub>14</sub> O <sub>6</sub>  | 8.06                 | 314.295                   | 17180     |
| 63  | isosinensetin             | C <sub>20</sub> H <sub>20</sub> O <sub>7</sub>  | 9.37                 | 372.375                   | 27940     |
| 64  | icariin                   | C <sub>33</sub> H <sub>40</sub> O <sub>15</sub> | 8.14                 | 676.66                    | 2645      |
| 65  | nobiletin                 | C <sub>21</sub> H <sub>22</sub> O <sub>8</sub>  | 10.52                | 402.39                    | 271700    |
| 66  | sinensetin                | C <sub>20</sub> H <sub>20</sub> O <sub>7</sub>  | 9.55                 | 372.37                    | 26320     |
| 67  | tangeretin                | C <sub>20</sub> H <sub>20</sub> O <sub>7</sub>  | 11.41                | 372.37                    | 102100    |
| 68  | isohyperoside             | C <sub>21</sub> H <sub>20</sub> O <sub>12</sub> | 5.91                 | 464.095                   | 15160000  |

| No.                    | Compound name                      | Predicted formula                                                 | Retention time (min) | Relative molecular weight | Peak area |
|------------------------|------------------------------------|-------------------------------------------------------------------|----------------------|---------------------------|-----------|
| 69                     | pectolarigenin                     | C <sub>17</sub> H <sub>14</sub> O <sub>6</sub>                    | 10.78                | 314.295                   | 15140     |
| 70                     | quercetin-O-glucoside              | C <sub>21</sub> H <sub>20</sub> O <sub>12</sub>                   | 6.54                 | 464.376                   | 48130000  |
| <b>flavonoids (59)</b> |                                    |                                                                   |                      |                           |           |
| 71                     | apigenin 5-O-glucoside             | C <sub>21</sub> H <sub>20</sub> O <sub>10</sub>                   | 6.68                 | 432.38                    | 193300    |
| 72                     | luteolin-7-O-beta-D-glucuronide    | C <sub>21</sub> H <sub>18</sub> O <sub>12</sub>                   | 6.53                 | 462.366                   | 327700    |
| 73                     | ophiopogonanone C                  | C <sub>19</sub> H <sub>16</sub> O <sub>7</sub>                    | 5.38                 | 356.332                   | 1585000   |
| 74                     | apigenin O-hexosyl-O-pentoside     | C <sub>26</sub> H <sub>28</sub> O <sub>14</sub>                   | 6.83                 | 564.1                     | 210400    |
| 75                     | methyl-Hesperidin                  | C <sub>29</sub> H <sub>38</sub> O <sub>16</sub>                   | 7.57                 | 642.59                    | 53470     |
| 76                     | hydroxygenkwanin                   | C <sub>16</sub> H <sub>12</sub> O <sub>6</sub>                    | 9.60                 | 300.263                   | 22750     |
| 77                     | engeletin                          | C <sub>21</sub> H <sub>22</sub> O <sub>10</sub>                   | 7.15                 | 434.393                   | 88690     |
| 78                     | apigenin 4-O-rhamnoside            | C <sub>21</sub> H <sub>20</sub> O <sub>9</sub>                    | 7.97                 | 416                       | 54720     |
| 79                     | amentoflavone                      | C <sub>30</sub> H <sub>18</sub> O <sub>10</sub>                   | 9.16                 | 538.46                    | 85320     |
| 80                     | apigenin 7-O-beta-D-glucuronide    | C <sub>21</sub> H <sub>18</sub> O <sub>11</sub>                   | 7.08                 | 446.3670044               | 32840     |
| 81                     | kuwanon A                          | C <sub>25</sub> H <sub>24</sub> O <sub>6</sub>                    | 0.70                 | 420.454                   | 166100    |
| 82                     | wogonoside                         | C <sub>22</sub> H <sub>20</sub> O <sub>11</sub>                   | 8.26                 | 460.388                   | 1706000   |
| 83                     | spiraeoside                        | C <sub>21</sub> H <sub>20</sub> O <sub>12</sub>                   | 6.59                 | 464.096                   | 8312000   |
| 84                     | saponarin                          | C <sub>27</sub> H <sub>30</sub> O <sub>15</sub>                   | 6.27                 | 594.518                   | 26010     |
| 85                     | isotrifoliin                       | C <sub>21</sub> H <sub>20</sub> O <sub>12</sub>                   | 6.59                 | 464.096                   | 8881000   |
| 86                     | kaempferin                         | C <sub>21</sub> H <sub>20</sub> O <sub>10</sub>                   | 7.35                 | 432.106                   | 1496000   |
| 87                     | Di-O-methylquercetin               | C <sub>17</sub> H <sub>14</sub> O <sub>7</sub>                    | 9.19                 | 330.1                     | 25780000  |
| 88                     | kaempferol 3-A-L-arabinopyranoside | C <sub>20</sub> H <sub>18</sub> O <sub>10</sub>                   | 7.08                 | 418.351                   | 4677      |
| 89                     | pinobanksin                        | C <sub>15</sub> H <sub>12</sub> O <sub>5</sub>                    | 7.06                 | 272.069                   | 73420000  |
| 90                     | afzelechin                         | C <sub>15</sub> H <sub>14</sub> O <sub>5</sub>                    | 0.68                 | 274.084                   | 184900    |
| 91                     | anhydroicaritin                    | C <sub>21</sub> H <sub>20</sub> O <sub>6</sub>                    | 12.67                | 368.38                    | 34120     |
| 92                     | epicatechin Gallate                | C <sub>22</sub> H <sub>18</sub> O <sub>10</sub>                   | 6.54                 | 442.379                   | 14500000  |
| 93                     | phlorizin                          | C <sub>21</sub> H <sub>24</sub> O <sub>10</sub>                   | 7.24                 | 436.41                    | 6545000   |
| 94                     | astilbin                           | C <sub>21</sub> H <sub>22</sub> O <sub>11</sub>                   | 6.75                 | 450.39                    | 168500    |
| 95                     | heptamethoxyflavone                | C <sub>22</sub> H <sub>24</sub> O <sub>9</sub>                    | 7.08                 | 432.42                    | 73890     |
| 96                     | vincetoxicoside B                  | C <sub>21</sub> H <sub>20</sub> O <sub>11</sub>                   | 6.97                 | 448.383                   | 2285000   |
| 97                     | (-)-gallocatechin                  | C <sub>15</sub> H <sub>14</sub> O <sub>7</sub>                    | 4.51                 | 306.267                   | 672800    |
| 98                     | taxifolin                          | C <sub>15</sub> H <sub>12</sub> O <sub>7</sub>                    | 6.89                 | 304.25                    | 82890000  |
| 99                     | silymarin                          | C <sub>25</sub> H <sub>22</sub> O <sub>10</sub>                   | 8.51                 | 482.44                    | 59560     |
| 100                    | isorhoifolin                       | C <sub>27</sub> H <sub>30</sub> O <sub>14</sub>                   | 6.84                 | 578.52                    | 7592      |
| 101                    | scutellarin                        | C <sub>21</sub> H <sub>18</sub> O <sub>12</sub>                   | 6.59                 | 462.36                    | 37440     |
| 102                    | rutin hydrate                      | C <sub>27</sub> H <sub>30</sub> O <sub>16</sub> ·H <sub>2</sub> O | 6.36                 | 610.52                    | 30210     |

| No.                      | Compound name                            | Predicted formula                                  | Retention time (min) | Relative molecular weight | Peak area |
|--------------------------|------------------------------------------|----------------------------------------------------|----------------------|---------------------------|-----------|
| 103                      | dihydromyricetin                         | C <sub>15</sub> H <sub>12</sub> O <sub>8</sub>     | 6.97                 | 320.25                    | 5322000   |
| 104                      | morin                                    | C <sub>15</sub> H <sub>10</sub> O <sub>7</sub>     | 8.05                 | 302.043                   | 33970000  |
| 105                      | dihydrokaempferol                        | C <sub>15</sub> H <sub>12</sub> O <sub>6</sub>     | 5.75                 | 288.063                   | 17930000  |
| 106                      | 7-O-methylepidictyol                     | C <sub>16</sub> H <sub>14</sub> O <sub>6</sub>     | 8.86                 | 302.079                   | 56400     |
| 107                      | 7-hydroxyflavone                         | C <sub>15</sub> H <sub>10</sub> O <sub>3</sub>     | 9.17                 | 238.24                    | 2198      |
| 108                      | isomucronulatol-7-O-glucoside            | C <sub>23</sub> H <sub>28</sub> O <sub>10</sub>    | 6.53                 | 464.469                   | 5360000   |
| 109                      | chrysoeriol 5-O-hexoside                 | C <sub>22</sub> H <sub>22</sub> O <sub>11</sub>    | 7.18                 | 462.404                   | 229400    |
| 110                      | kaempferol-3-gentiobioside               | C <sub>27</sub> H <sub>30</sub> O <sub>16</sub>    | 6.28                 | 610.525                   | 38800     |
| 111                      | narcissoside                             | C <sub>28</sub> H <sub>32</sub> O <sub>16</sub>    | 6.82                 | 624.544                   | 118300    |
| 112                      | apigenin C-glucoside                     | C <sub>21</sub> H <sub>20</sub> O <sub>10</sub>    | 6.46                 | 432.113                   | 70130     |
| 113                      | irisolidone 7-O-beta-d-glucoside         | C <sub>23</sub> H <sub>24</sub> O <sub>11</sub>    | 0.97                 | 476.43                    | 8800      |
| 114                      | apigenin-6,8-di-C-glycoside              | C <sub>27</sub> H <sub>30</sub> O <sub>15</sub>    | 5.73                 | 594.518                   | 125600    |
| 115                      | 5,7-dihydroxy-3',4',5'-trimethoxyflavone | C <sub>18</sub> H <sub>16</sub> O <sub>7</sub>     | 4.99                 | 344.09                    | 306000    |
| 116                      | chalcone                                 | C <sub>15</sub> H <sub>12</sub> O                  | 6.47                 | 208.255                   | 510100    |
| 117                      | 5-methoxyflavone                         | C <sub>16</sub> H <sub>12</sub> O <sub>3</sub>     | 10.47                | 252.26                    | 260400    |
| 118                      | chrysoeriol 7-O-hexoside                 | C <sub>22</sub> H <sub>22</sub> O <sub>11</sub>    | 7.20                 | 448.4                     | 307800    |
| 119                      | luteolin-4'-O-glucoside                  | C <sub>21</sub> H <sub>20</sub> O <sub>11</sub>    | 6.80                 | 448.101                   | 150600000 |
| 120                      | O-methylnaringenin C-pentoside           | C <sub>21</sub> H <sub>22</sub> O <sub>9</sub>     | 0.72                 | 418.1                     | 144700    |
| 121                      | columbianetin                            | C <sub>14</sub> H <sub>14</sub> O <sub>4</sub>     | 6.86                 | 246.263                   | 31530     |
| 122                      | homoplantagin                            | C <sub>22</sub> H <sub>22</sub> O <sub>11</sub>    | 7.19                 | 462.403                   | 337300    |
| 123                      | 4'-O-glucosylvitexin                     | C <sub>27</sub> H <sub>30</sub> O <sub>15</sub>    | 6.28                 | 594.518                   | 253000    |
| 124                      | eriodictyol-7-O-glucoside                | C <sub>21</sub> H <sub>22</sub> O <sub>11</sub>    | 5.77                 | 450.393                   | 12610000  |
| 125                      | troxerutin                               | C <sub>33</sub> H <sub>42</sub> O <sub>19</sub>    | 6.57                 | 742.68                    | 16210     |
| 126                      | linarin                                  | C <sub>28</sub> H <sub>32</sub> O <sub>14</sub>    | 7.79                 | 592.553                   | 238900    |
| 127                      | kaempferol-3-O-rutinoside                | C <sub>27</sub> H <sub>30</sub> O <sub>15</sub>    | 6.51                 | 594.526                   | 222500    |
| 128                      | oroxin A                                 | C <sub>21</sub> H <sub>20</sub> O <sub>10</sub>    | 7.56                 | 432.378                   | 337200    |
| 129                      | rhamnetin                                | C <sub>16</sub> H <sub>12</sub> O <sub>7</sub>     | 6.88                 | 316.262                   | 305300    |
| <b>anthocyanins (13)</b> |                                          |                                                    |                      |                           |           |
| 130                      | procyanidin B2                           | C <sub>30</sub> H <sub>26</sub> O <sub>12</sub>    | 5.16                 | 578.529                   | 265500    |
| 131                      | petunidin-3-O-glucoside chloride         | C <sub>22</sub> H <sub>23</sub> O <sub>12</sub> Cl | 5.28                 | 514.865                   | 85160     |

| No.                       | Compound name              | Predicted formula                                 | Retention time (min) | Relative molecular weight | Peak area |
|---------------------------|----------------------------|---------------------------------------------------|----------------------|---------------------------|-----------|
| 132                       | procyanidin B3             | C <sub>30</sub> H <sub>26</sub> O <sub>12</sub>   | 5.15                 | 578.142                   | 151500    |
| 133                       | rhein                      | C <sub>15</sub> H <sub>8</sub> O <sub>6</sub>     | 10.11                | 284.225                   | 631300    |
| 134                       | myrtillin chloride         | C <sub>21</sub> H <sub>21</sub> ClO <sub>12</sub> | 8.52                 | 500.84                    | 36160     |
| 135                       | callistephin chloride      | C <sub>21</sub> H <sub>21</sub> ClO <sub>10</sub> | 5.44                 | 468.84                    | 3218      |
| 136                       | idaein chloride            | C <sub>21</sub> H <sub>21</sub> ClO <sub>11</sub> | 5.21                 | 484.84                    | 16360000  |
| 137                       | peonidin chloride          | C <sub>16</sub> H <sub>13</sub> ClO <sub>6</sub>  | 11.42                | 336.72                    | 31910     |
| 138                       | cyanidin 3-O-glucoside     | C <sub>21</sub> H <sub>21</sub> ClO <sub>11</sub> | 5.21                 | 484.84                    | 20280000  |
| 139                       | rhein 8-Glucoside          | C <sub>21</sub> H <sub>18</sub> O <sub>11</sub>   | 7.10                 | 446.3670044               | 61750     |
| 140                       | delphinidin 3-O-rutinoside | C <sub>27</sub> H <sub>31</sub> O <sub>16</sub>   | 6.35                 | 611.5                     | 20000     |
| 141                       | petunidin 3-O-glucoside    | C <sub>22</sub> H <sub>23</sub> O <sub>12</sub>   | 0.98                 | 479                       | 188900    |
| 142                       | cyanidin O-rutinoside      | C <sub>27</sub> H <sub>31</sub> O <sub>15</sub>   | 6.66                 | 595.52                    | 94820     |
| <b>isoflavonoids (14)</b> |                            |                                                   |                      |                           |           |
| 143                       | prunetin                   | C <sub>16</sub> H <sub>12</sub> O <sub>5</sub>    | 6.77                 | 284.069                   | 13210     |
| 144                       | orobol                     | C <sub>15</sub> H <sub>10</sub> O <sub>6</sub>    | 11.19                | 286.048                   | 63280     |
| 145                       | glabridin                  | C <sub>20</sub> H <sub>20</sub> O <sub>4</sub>    | 11.47                | 324.37                    | 1467      |
| 146                       | puerarin                   | C <sub>21</sub> H <sub>20</sub> O <sub>10</sub>   | 5.75                 | 432.38                    | 12970     |
| 147                       | 2'-hydroxydaidzein         | C <sub>15</sub> H <sub>10</sub> O <sub>5</sub>    | 7.24                 | 270.053                   | 109600    |
| 148                       | 2'-hydroxygenistein        | C <sub>15</sub> H <sub>10</sub> O <sub>6</sub>    | 8.02                 | 286.048                   | 126200    |
| 149                       | medicarpin                 | C <sub>16</sub> H <sub>14</sub> O <sub>4</sub>    | 7.26                 | 270.285                   | 44610     |
| 150                       | protobioside               | C <sub>45</sub> H <sub>74</sub> O <sub>18</sub>   | 7.89                 | 903.071                   | 71930     |
| 151                       | sissotrin                  | C <sub>22</sub> H <sub>22</sub> O <sub>10</sub>   | 6.23                 | 446.121                   | 974500    |
| 152                       | deguelin                   | C <sub>23</sub> H <sub>22</sub> O <sub>6</sub>    | 12.14                | 394.42                    | 51040     |
| 153                       | 6''-O-xylosyl-glycitin     | C <sub>27</sub> H <sub>30</sub> O <sub>14</sub>   | 6.30                 | 578.519                   | 26220     |
| 154                       | ipriflavone                | C <sub>18</sub> H <sub>16</sub> O <sub>3</sub>    | 12.60                | 280.32                    | 28510     |
| 155                       | sophoricoside              | C <sub>21</sub> H <sub>20</sub> O <sub>10</sub>   | 7.04                 | 432.38                    | 589400    |
| 156                       | ononin                     | C <sub>22</sub> H <sub>22</sub> O <sub>9</sub>    | 1.04                 | 430.405                   | 14520     |

**Table S2.** Physicochemical properties of the macroporous resins used in this study

| Resins  | Particle size (mm) | Surface area (m <sup>2</sup> /g) | Average pore diameter (nm) | Polarity   |
|---------|--------------------|----------------------------------|----------------------------|------------|
| NKA-9   | 0.3-1.25           | 170-250                          | 15.5-16.5                  | Polar      |
| AB-8    | 0.3-1.25           | 450-530                          | 13.0-14.0                  | Weak polar |
| DM130   | 0.3-1.25           | 500-550                          | 9.0-10.0                   | Weak polar |
| HPD-100 | 0.3-1.25           | 480-520                          | 25.0-28.0                  | Non-polar  |
| D101    | 0.3-1.25           | 500-600                          | 21.0-23.0                  | Non-polar  |

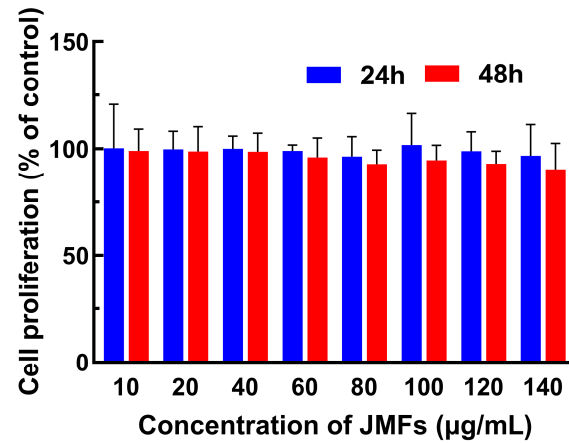

**Figure S1.** The effects of JMFs on the proliferation of HL-7702 cells.

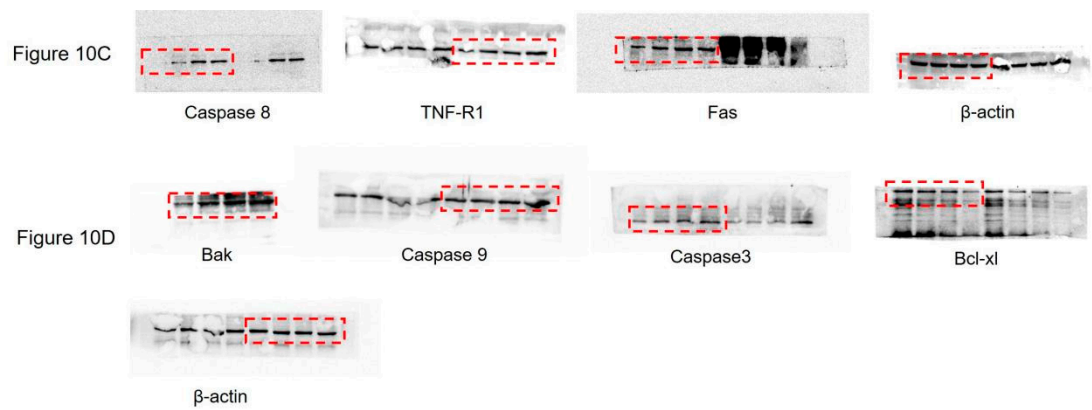

**Figure S2.** The original Western blot images for panels in Figure 10. The areas within the red boxes are cropped and presented in Figure 10C, and 10D.

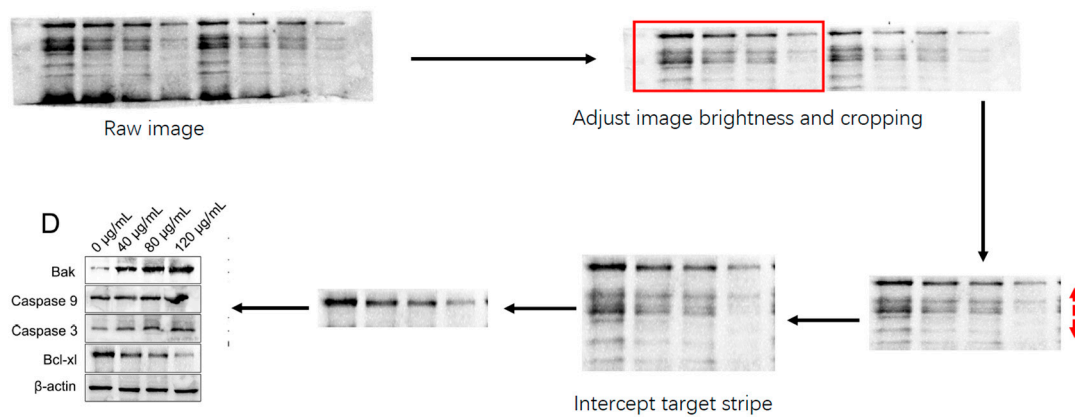

**Figure S3.** Steps taken to obtain Figure 10D.
